# Supplementary material for: OpenProt 2.0 builds a path to the functional characterization of alternative proteins
Source: PubMed Central journal article supplement (PMC10767855; doi:10.1093/nar/gkad1050), 2023-11-13
Supplement: gkad1050_supplemental_file.pdf [file gkad1050_supplemental_file.pdf]

## **Supplementary Material**

\*\*\*\*\*

### TABLE OF CONTENT

**Supplementary S1:** Summary of the methods.

**Supplementary S2:** General statistics per species for OpenProt v2.0

**Supplementary S3:** Protein structure and disorder predictions

**Supplementary S4:** List of mass spectrometry and ribosome profiling studies incorporated in OpenProt v2.0

\*\*\*\*\*

## **Supplementary S1: Summary of the methods**

A summary of the methods behind all OpenProt features presented in the initial release was published in the OpenProt 2021 update [1]. We present below some minor modifications in this 2024 update resulting from new annotation releases and the use of the latest version for all software. We also present new developments.

### **1. Summary of previous methods with minor modifications**

- a. **OpenProt ORFeome, reference protein, novel isoform, alternative protein** - OpenProt retrieves the transcriptome from both NCBI RefSeq [2] (release 217) and Ensembl [3] (release 106) and predicts ORFs from a 3-frames in silico translation using EMBOSS Transeq (6.6.0) [4]. All ORFs with an ATG initiating codon and a minimal length of 30 codons are annotated and constitutes the OpenProt ORFeome. After in silico translation, three categories of proteins are annotated:
  - i. A reference protein (or RefProt) is a protein matching a NCBI RefSeq [2], Ensembl [3] or UniProt [5] (release\_2022\_06) protein entry. A RefProt is identified with the accession number from NCBI RefSeq, Ensembl and/or UniProt.
  - ii. A novel isoform is a protein encoded in the same gene as a RefProt with at least one of the two following features: (a) over 80 % of protein sequence identity with the RefProt over 50% of the length using Basic Local Alignment Search Tool (BLAST); (b) identical genomic coordinates of start or end codon with a sequence identity (EMBOSS Matcher PAM10 matrix score  $\leq 100$ ) over 20% of the length of the RefProt. A novel isoform is identified with a specific accession number starting with II\_.
  - iii. An alternative protein (or AltProt) does not have any significant similarity with a RefProt and is identified with a specific accession number starting with IP\_.
- b. **Ribosome profiling data reanalysis** - Ribo-seq datasets are downloaded from the Gene Omnibus platform [6] and reanalyzed using the PRICE workflow [7] run with default parameters, except for the FDR set at 1 % (instead of 10%). After filtering out ribosomal RNA reads, PRICE generates a list of ORF candidates based on likely codons. A stringent 1% FDR filter is applied for highly confident translation events.
- c. **Conservation analysis** - Protein sequence homology is assessed using an InParanoid-like workflow [1], distinguishing orthologs (homologous sequences from different species) from paralogs (homologous sequences from the same species but different genes). Orthologs are identified through all-vs-all BLAST searches between species and within the same species for paralogs. Orthology relationships are established with a bit-score above 40 and an overlap exceeding

50% of the queried sequence.

- d. **Protein functional domain** - All proteins annotated on OpenProt are scanned for the presence of known functional signatures using InterProScan (5.61-93.0) [8] with the default parameters. Domain predictions as well as gene ontology (GO) and pathway annotations are reported if significant (e-value < 10<sup>-3</sup>).

## 2. Updated mass spectrometry data analysis pipeline in the OpenProt

OpenProt re-analyzes mass spectrometry (MS) datasets to gather evidence of expression for every protein annotated in the OpenProt database, *i.e.* RefProts, AltProts and Isoforms. The updated pipeline is described in the main text. It is important to note that when a peptide matches both an AltProt or a novel isoform and a RefProt, it is assigned to the RefProt only.

## 3. Spectral viewer

A bespoke spectrum viewer was implemented in JavaScript to visualize all spectra that resulted from the mass spectrometry re-analysis. The peak annotations for each spectrum are from the PeptideShaker report of the corresponding analysis.

## 4. Integration of other predictions

- a. Protein structure  
MMseqs2 [9] was used to generate large-scale multiple alignment sequences (MSAs). These MSAs serve as inputs for the AlphaFold network, a feature provided by ColabFold with default settings [10]. The installer script was installed within a Singularity image and executed on supercomputers managed by Calcul Québec and the Digital Research Alliance of Canada. For proteins with multiple sequence alignments of less than 30, we utilized OmegaFold the first computational approach that achieved the successful prediction of high-resolution protein structures solely from a single primary sequence [11].
- b. Subcellular localization  
The DeepLoc 2.0 [12] program was obtained from [https://services.healthtech.dtu.dk/cgi-bin/sw\\_request?software=deeploc&version=2.0&packageversion=2.0&platform=All](https://services.healthtech.dtu.dk/cgi-bin/sw_request?software=deeploc&version=2.0&packageversion=2.0&platform=All), installed in an Apptainer container and executed. We used the high-quality (slow) and short output settings. The fasta file generated by OpenProt for all species was given as the input and the csv file of the output is displayed directly on the website.
- c. Intrinsic disorder  
A Docker image of the fIDPnn disorder and disorder function predictor [13]

(<https://gitlab.com/sina.ghadermarzi/fldpnn/-/tree/master>) was utilized and executed within a Docker container. Input files in Fasta format containing the protein sequences were employed. The resulting output comprises a graph that illustrates the fIDPnn score, which is a measure of the probability of disorder (with a threshold of 0.3), along with potential functions such as protein binding, DNA binding, RNA binding, and acting as a linker.

d. Short linear motifs (SLiMs)

We downloaded the tsv file containing all the ELM database Classes using the ELM API ([http://elm.eu.org/elms/elms\\_index.tsv](http://elm.eu.org/elms/elms_index.tsv)). SLiMs were predicted using the regular expression of the corresponding ELM class. Since this method tends to return a high amount of false positive and true SLiMs are mostly located in disordered regions of a protein [14], we used fIDPnn disorder predictions to discard all predicted SLiMs containing at least one residue predicted as ordered.

e. Genotype-Tissue Expression (GTEx)

The data used for the analyses described in this manuscript were obtained from: the GTEx Portal on 07/20/2023 [15]. Expression data from all samples were kept structured at the transcript level rather than aggregated by genes in order to obtain transcript level distributions.

## References

- [1] Brunet,M.A., Brunelle,M., Lucier,J.F., Delcourt,V., Levesque,M., Grenier,F., Samandi,S., Leblanc,S., Aguilar,J.D., Dufour,P. et al. (2019) OpenProt: a more comprehensive guide to explore eukaryotic coding potential and proteomes. *Nucleic Acids Res.*, **47**, D403–D410.
- [2] O'Leary,N.A., Wright,M.W., Brister,J.R., Ciufu,S., Haddad,D., McVeigh,R., Rajput,B., Robbertse,B., Smith-White,B., Ako-Adjei,D. et al. (2016) Reference sequence (RefSeq) database at NCBI: current status, taxonomic expansion, and functional annotation. *Nucleic Acids Res.*, **44**, D733-D745
- [3] Cunningham,F., Allen,J.E., Allen,J., Alvarez-Jarreta,J., Amode,M.R., Armean,I.M., Austine-Orimoloye,O., Azov,A.G., Barnes,I., Bennett,R. et al. (2022) Ensembl 2022. *Nucleic Acids Res.*, **50**, D988-D995
- [4] Madeira,F., Pearce,M., Tivey,A.R.N., Basutkar,P., Lee,J., Edbali,O., Madhusoodanan,N., Kolesnikov,A. and Lopez,R. (2022) Search and sequence analysis tools services from EMBL-EBI in 2022. *Nucleic Acids Res.*, **50**, W276-W279.
- [5] The UniProt consortium (2023) UniProt: the universal protein knowledgebase in 2023. *Nucleic Acids Res.*, **51**, D523-D531.
- [6] Barrett,T., Wilhite,S.E., Ledoux,P., Evangelista,C., Kim,I.F., Tomashevsky,M., Marshall,K.A., Phillippy,K.H., Sherman,P.M., Holko,M. et al. (2013) NCBI:GEO: archive for functional genomics data sets-update. *Nucleic Acids Res.*, **41**, D991-D995.
- [7] Erhard,F., Halenius,A., Zimmermann,C., L'Hernault,A., Kowalewski,D.J., Weekes,M.P., Stevanovic,S., Zimmer,R., Dölken,L. (2018) Improved Ribo-seq enables identification of cryptic translation events. *Nat. Methods*, **15**, 363–366.
- [8] Paysan-Lafosse,T., Blum,M., Chuguransky,S., Grego,T., Pinto,B.L., Salazar,G.A., Bileschi,M.L., Bork,P., Bridge,A., Colwell,L. (2022) InterPro in 2022. *Nucleic Acids Res.*, **51**,

D418-D427.

- [9] Steinegger,M. and Söding,J. (2017) MMseqs2 enables sensitive protein sequence searching for the analysis of massive data sets. *Nat. Biotechnol.*, **35**, 1026–1028
- [10] Mirdita,M., Schütze,K., Moriwaki,Y., Heo,L., Ovchinnikov,S and Steinegger,M. (2022) ColabFold: making protein folding accessible to all. *Nat Methods*, **19**, 979-682
- [11] Wu,R., Ding,F., Wang,R., Shen,R., Zhang,X., Luo,S., Su,C., Wu,Z., Xie,Q., Berger,B. et al. (2022) High-resolution de novo structure prediction from primary sequence. BioRxiv doi: <https://doi.org/10.1101/2022.07.21.500999>, 22 July 2022, pre-print: not peer-reviewed.
- [12] Thummuluri,V., Almagro Armenteros,J.J., Johansen,A.R., Nielsen,H. and Winther,O. (2022) DeepLoc 2.0: multi-label subcellular localization prediction using protein language models. *Nucleic Acids Res.*, **50**, W228–W234.
- [13] Hu,G., Katuwawala,A., Wang,K., Wu,Z., Ghadermarzi,S., Gao,J. and Kurgan,L. (2021) fIDPnn: Accurate intrinsic disorder prediction with putative propensities of disorder functions. *Nat Comm.*, **12**, 4438.
- [14] Kumar,M., Michael,S., Alvarado-Valverde,J., Mészáros,B., Sámano-Sánchez,H., Zeke,A., Dobson,L., Lazar,T., Örd,M., Nagpal,A. et al. (2022) The Eukaryotic Linear Motif resource: 2022 release. *Nucleic Acids Res.*, **50**, D497–D508.
- [15] GTEx Consortium (2013) The genotype-tissue expression (GTEx) project. *Nat Genet.*, **45**, 580-585.

**Supplementary S2: General statistics per species for OpenProt v2.0**

Here are the summary statistics for all species supported in OpenProt v2.0: [Homo sapiens](#), [Pan troglodytes](#), [Mus musculus](#), [Rattus norvegicus](#), [Bos taurus](#), [Ovis aries](#), [Danio rerio](#), [Drosophila melanogaster](#), [Caenorhabditis elegans](#) and [Saccharomyces cerevisiae](#).

Legend for the pie charts: ncRNA = non-coding RNA; UTR = untranslated region of an mRNA; MS = mass spectrometry.

\*\*\* OpenProt v2.0 general statistics in *Homo sapiens* \*\*\*

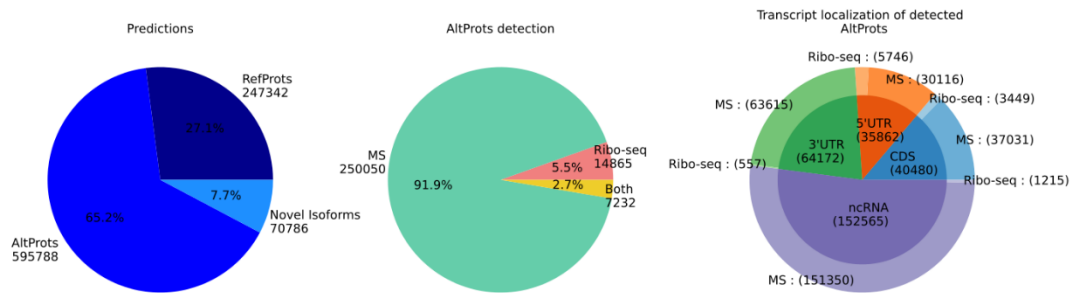

\*\*\* OpenProt v2.0 general statistics in *Pan troglodytes* \*\*\*

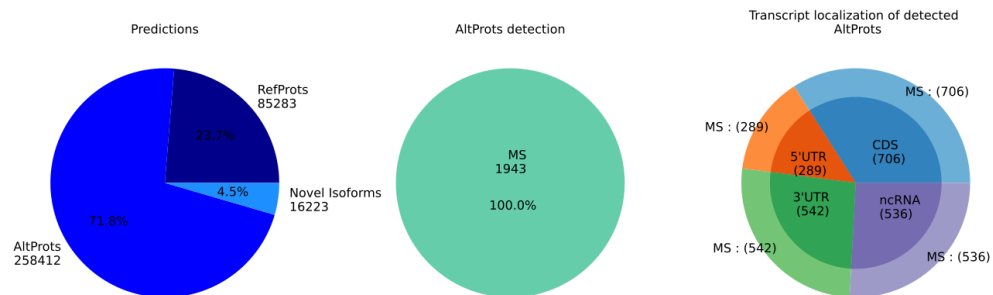

Please note that no ribosome profiling data was available for *Pan troglodytes*.

\*\*\* OpenProt v2.0 general statistics in *Mus musculus* \*\*\*

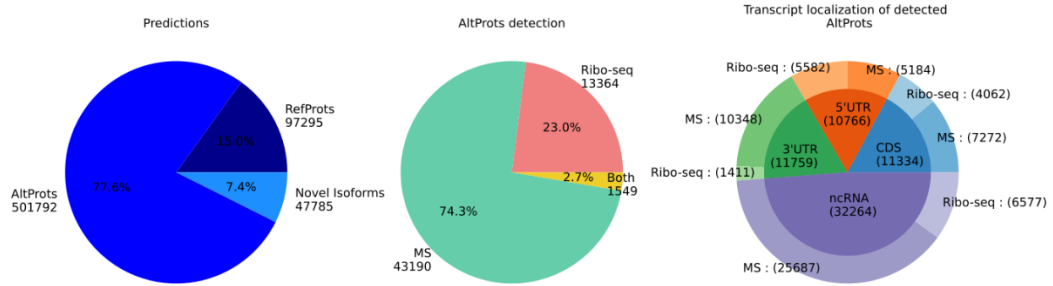

\*\*\* OpenProt v2.0 general statistics in *Rattus norvegicus* \*\*\*

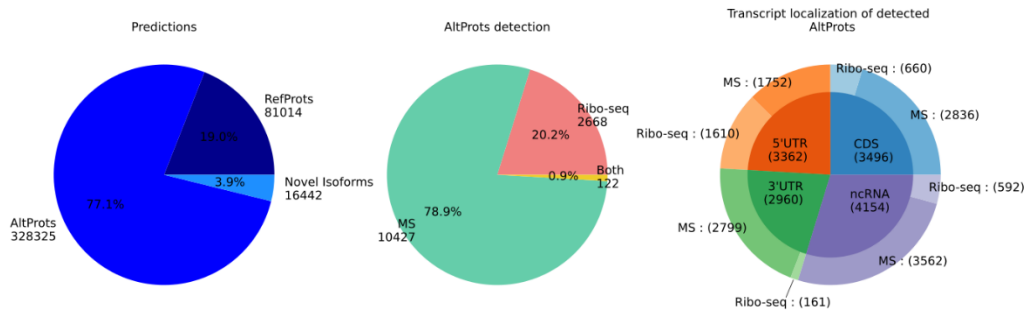

\*\*\* OpenProt v2.0 general statistics in *Bos taurus* \*\*\*

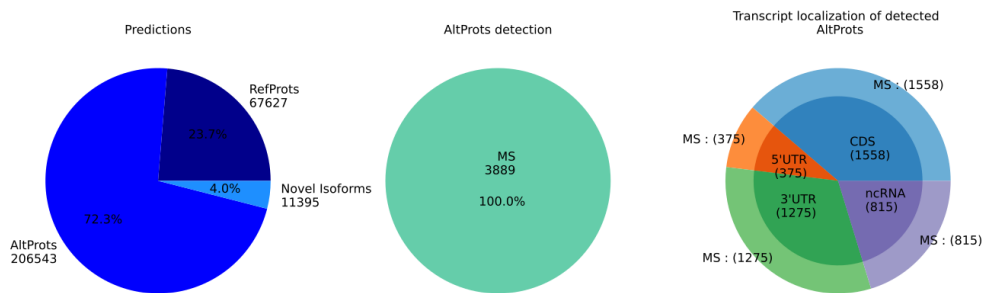

Please note that no ribosome profiling data was available for *Bos taurus*.

\*\*\* OpenProt v2.0 general statistics in *Ovis aries* \*\*\*

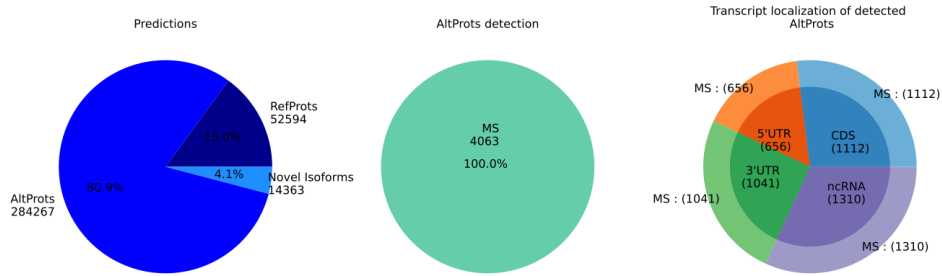

Please note that no ribosome profiling data was available for *Ovis aries*.

\*\*\* OpenProt v2.0 general statistics in *Xenopus tropicalis* \*\*\*

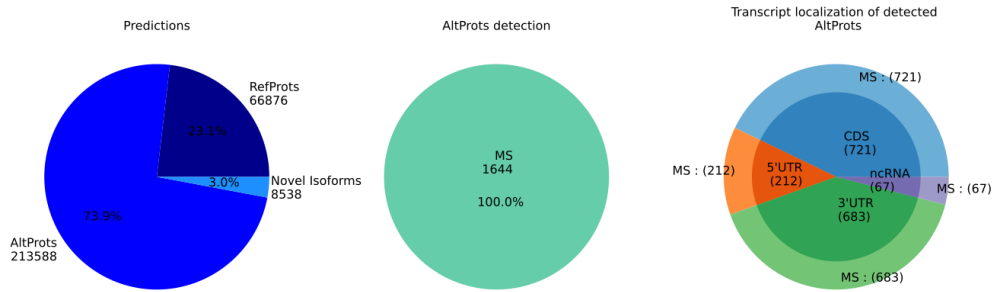

Please note that no ribosome profiling data was available for *Xenopus tropicalis*.

\*\*\* OpenProt v2.0 general statistics in *Danio rerio* \*\*\*

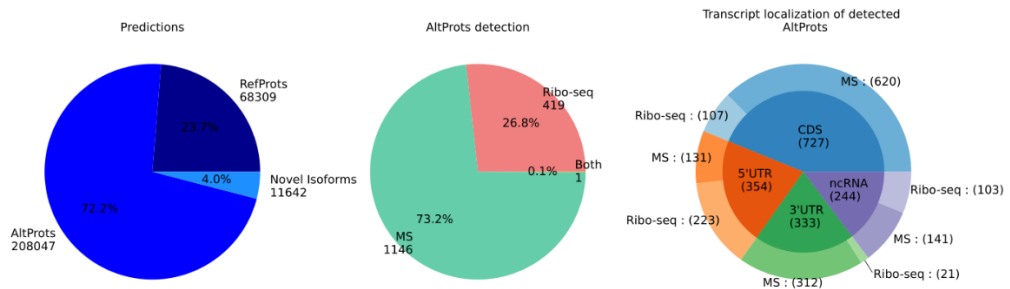



\*\*\* OpenProt v2.0 general statistics in *Drosophila melanogaster* \*\*\*

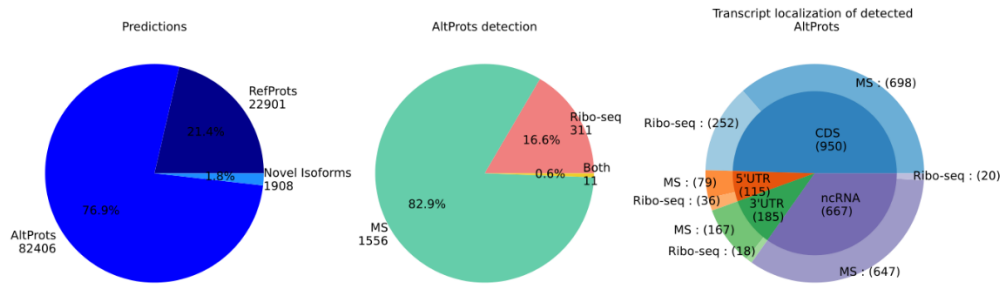

\*\*\* OpenProt v2.0 general statistics in *Caenorhabditis elegans* \*\*\*

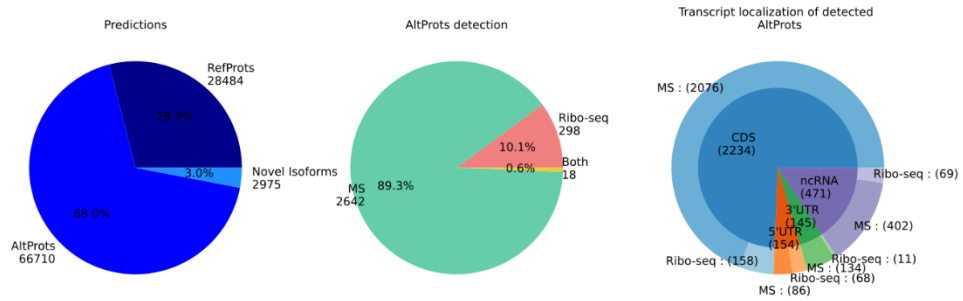

\*\*\* OpenProt v2.0 general statistics in *Saccharomyces cerevisiae* **S288c** \*\*\*

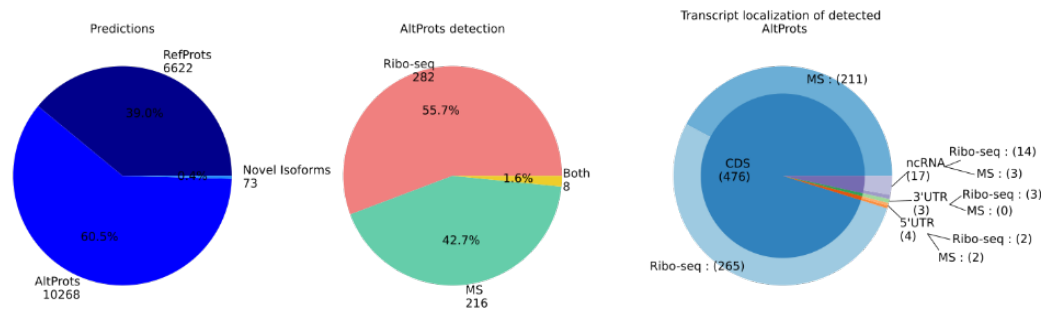

\*\*\* OpenProt v2.0 general statistics in *Arabidopsis Thaliana* \*\*\*

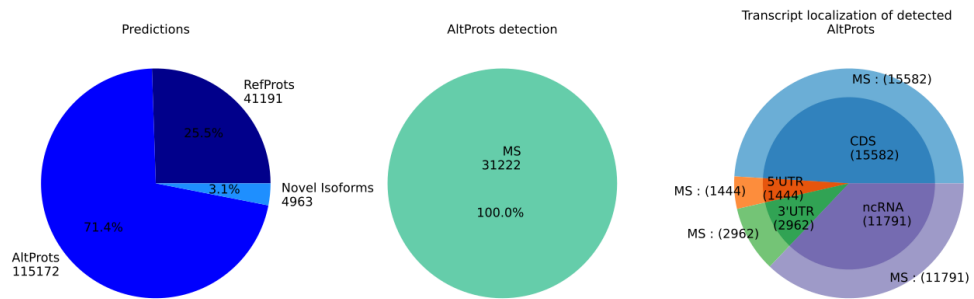

Please note that no ribosome profiling data was available for *Arabidopsis Thaliana*.

### Supplementary S3: protein structure and disorder predictions

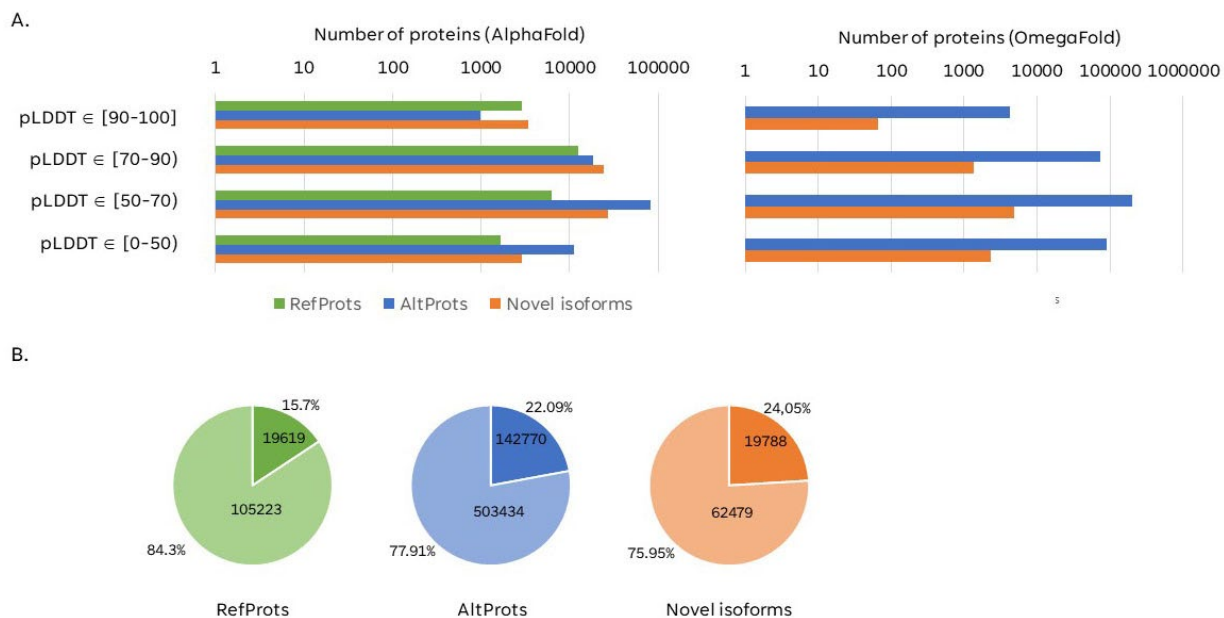

(A) A significant number of human AltProts and novel isoforms display a high ( $90 > \text{pLDDT} > 70$ ) to very high ( $\text{pLDDT} > 90$ ) confidence score. Proteins with more than 30 or less than 30 multiple sequence alignments were analyzed with AlphaFold or OmegaFold, respectively. For RefProts, pLDDT scores were retrieved from the AlphaFold database. (B) Charts represent the fraction of proteins with at least one IDR (plain colour) or with no IDR (pale colour).

## Supplementary S4

*List of mass spectrometry and ribosome profiling studies incorporated in OpenProt v2.0*

List of the 101 **mass spectrometry** datasets incorporated in OpenProt v2.0 with the associated species and citation (PMID accession).

| Species        |              | Study ID  | Data source                                                                                                                                                                                           | PMID     |
|----------------|--------------|-----------|-------------------------------------------------------------------------------------------------------------------------------------------------------------------------------------------------------|----------|
| Arabidopsis    | thaliana     | PXD013868 | <a href="https://www.ebi.ac.uk/pride/archive/projects/PXD013868">https://www.ebi.ac.uk/pride/archive/projects/PXD013868</a>                                                                           | 32188942 |
| Bos            | taurus       | PXD001741 | <a href="https://www.ebi.ac.uk/pride/archive/projects/PXD001741">https://www.ebi.ac.uk/pride/archive/projects/PXD001741</a>                                                                           | 25818294 |
| Caenorhabditis | elegans      | PXD015644 | <a href="https://www.ebi.ac.uk/pride/archive/projects/PXD015644">https://www.ebi.ac.uk/pride/archive/projects/PXD015644</a>                                                                           | 31754102 |
| Danio          | rerio        | PXD003455 | <a href="https://www.ebi.ac.uk/pride/archive/projects/PXD003455">https://www.ebi.ac.uk/pride/archive/projects/PXD003455</a>                                                                           | 27696471 |
| Danio          | rerio        | PXD004876 | <a href="https://www.ebi.ac.uk/pride/archive/projects/PXD004876">https://www.ebi.ac.uk/pride/archive/projects/PXD004876</a>                                                                           | 27898262 |
| Danio          | rerio        | PXD011929 | <a href="https://www.ebi.ac.uk/pride/archive/projects/PXD011929">https://www.ebi.ac.uk/pride/archive/projects/PXD011929</a>                                                                           | 32284610 |
| Danio          | rerio        | PXD006098 | <a href="https://www.ebi.ac.uk/pride/archive/projects/PXD006098">https://www.ebi.ac.uk/pride/archive/projects/PXD006098</a>                                                                           | 28381614 |
| Drosophila     | melanogaster | PXD003944 | <a href="https://www.ebi.ac.uk/pride/archive/projects/PXD003944">https://www.ebi.ac.uk/pride/archive/projects/PXD003944</a>                                                                           | 27956707 |
| Drosophila     | melanogaster | PXD001455 | <a href="https://www.ebi.ac.uk/pride/archive/projects/PXD001455">https://www.ebi.ac.uk/pride/archive/projects/PXD001455</a>                                                                           | 25403936 |
| Homo           | Sapiens      | PXD002815 | <a href="https://www.ebi.ac.uk/pride/archive/projects/PXD002815">https://www.ebi.ac.uk/pride/archive/projects/PXD002815</a>                                                                           | 26496610 |
| Homo           | sapiens      | PXD002516 | <a href="https://www.ebi.ac.uk/pride/archive/projects/PXD002516">https://www.ebi.ac.uk/pride/archive/projects/PXD002516</a>                                                                           | 26892330 |
| Homo           | sapiens      | PXD004710 | <a href="https://www.ebi.ac.uk/pride/archive/projects/PXD004710">https://www.ebi.ac.uk/pride/archive/projects/PXD004710</a>                                                                           | 27801565 |
| Homo           | sapiens      | PXD004242 | <a href="https://www.ebi.ac.uk/pride/archive/projects/PXD004242">https://www.ebi.ac.uk/pride/archive/projects/PXD004242</a>                                                                           | 28007936 |
| Homo           | sapiens      | TCGA_COCA | <a href="https://cptc-xfer.uis.georgetown.edu/publicData/Phase_II_Data/TCGA_Colorectal_Cancer_S_022/">https://cptc-xfer.uis.georgetown.edu/publicData/Phase_II_Data/TCGA_Colorectal_Cancer_S_022/</a> | 25043054 |
| Homo           | sapiens      | PXD003965 | <a href="https://www.ebi.ac.uk/pride/archive/projects/PXD003965">https://www.ebi.ac.uk/pride/archive/projects/PXD003965</a>                                                                           | 28208246 |
| Homo           | sapiens      | PXD002214 | <a href="https://www.ebi.ac.uk/pride/archive/projects/PXD002214">https://www.ebi.ac.uk/pride/archive/projects/PXD002214</a>                                                                           | 26371159 |

|      |         |           |                                                                                                                             |          |
|------|---------|-----------|-----------------------------------------------------------------------------------------------------------------------------|----------|
|      |         |           | <a href="#">002214</a>                                                                                                      |          |
| Homo | sapiens | CCLC_2020 | <a href="https://portals.broadinstitute.org/cclc/about">https://portals.broadinstitute.org/cclc/about</a>                   | 31978347 |
| Homo | sapiens | PXD004778 | <a href="https://www.ebi.ac.uk/pride/archive/projects/PXD004778">https://www.ebi.ac.uk/pride/archive/projects/PXD004778</a> | 28071820 |
| Homo | sapiens | PXD004900 | <a href="https://www.ebi.ac.uk/pride/archive/projects/PXD004900">https://www.ebi.ac.uk/pride/archive/projects/PXD004900</a> | 27806443 |
| Homo | sapiens | PXD004764 | <a href="https://www.ebi.ac.uk/pride/archive/projects/PXD004764">https://www.ebi.ac.uk/pride/archive/projects/PXD004764</a> | 28071820 |
| Homo | sapiens | TCGA_BRCA | <a href="https://cptac-data-portal.georgetown.edu/cptac/s/S030">https://cptac-data-portal.georgetown.edu/cptac/s/S030</a>   | 27251275 |
| Homo | sapiens | TCGA_OVCA | <a href="https://cptac-data-portal.georgetown.edu/cptac/s/S026">https://cptac-data-portal.georgetown.edu/cptac/s/S026</a>   | 27372738 |
| Homo | sapiens | PXD000788 | <a href="https://www.ebi.ac.uk/pride/archive/projects/PXD000788">https://www.ebi.ac.uk/pride/archive/projects/PXD000788</a> | 24797263 |
| Homo | sapiens | BioPlex_1 | <a href="https://bioplex.hms.harvard.edu/download.php">https://bioplex.hms.harvard.edu/download.php</a>                     | 26186194 |
| Homo | sapiens | PXD003708 | <a href="https://www.ebi.ac.uk/pride/archive/projects/PXD003708">https://www.ebi.ac.uk/pride/archive/projects/PXD003708</a> | 27987026 |
| Homo | sapiens | PXD003902 | <a href="https://www.ebi.ac.uk/pride/archive/projects/PXD003902">https://www.ebi.ac.uk/pride/archive/projects/PXD003902</a> | 28007913 |
| Homo | sapiens | PXD002854 | <a href="https://www.ebi.ac.uk/pride/archive/projects/PXD002854">https://www.ebi.ac.uk/pride/archive/projects/PXD002854</a> | 27135364 |
| Homo | sapiens | PXD005083 | <a href="https://www.ebi.ac.uk/pride/archive/projects/PXD005083">https://www.ebi.ac.uk/pride/archive/projects/PXD005083</a> | 28196878 |
| Homo | sapiens | PXD003947 | <a href="https://www.ebi.ac.uk/pride/archive/projects/PXD003947">https://www.ebi.ac.uk/pride/archive/projects/PXD003947</a> | 27444420 |
| Homo | sapiens | PXD001889 | <a href="https://www.ebi.ac.uk/pride/archive/projects/PXD001889">https://www.ebi.ac.uk/pride/archive/projects/PXD001889</a> | 28248240 |
| Homo | sapiens | PXD004541 | <a href="https://www.ebi.ac.uk/pride/archive/projects/PXD004541">https://www.ebi.ac.uk/pride/archive/projects/PXD004541</a> | 27827301 |
| Homo | sapiens | PXD013647 | <a href="https://www.ebi.ac.uk/pride/archive/projects/PXD013647">https://www.ebi.ac.uk/pride/archive/projects/PXD013647</a> | 31513346 |
| Homo | sapiens | PXD009208 | <a href="https://www.ebi.ac.uk/pride/archive/projects/PXD009208">https://www.ebi.ac.uk/pride/archive/projects/PXD009208</a> | 30157440 |
| Homo | sapiens | PXD003940 | <a href="https://www.ebi.ac.uk/pride/archive/projects/PXD003940">https://www.ebi.ac.uk/pride/archive/projects/PXD003940</a> | 27976581 |
| Homo | sapiens | PXD004625 | <a href="https://www.ebi.ac.uk/pride/archive/projects/PXD004625">https://www.ebi.ac.uk/pride/archive/projects/PXD004625</a> | 27879288 |
| Homo | sapiens | PXD004437 | <a href="https://www.ebi.ac.uk/pride/archive/projects/PXD004437">https://www.ebi.ac.uk/pride/archive/projects/PXD004437</a> | 27890679 |

|      |         |           |                                                                                                                             |          |
|------|---------|-----------|-----------------------------------------------------------------------------------------------------------------------------|----------|
| Homo | sapiens | PXD009668 | <a href="https://www.ebi.ac.uk/pride/archive/projects/PXD009668">https://www.ebi.ac.uk/pride/archive/projects/PXD009668</a> | 30607034 |
| Homo | sapiens | PXD004624 | <a href="https://www.ebi.ac.uk/pride/archive/projects/PXD004624">https://www.ebi.ac.uk/pride/archive/projects/PXD004624</a> | 27879288 |
| Homo | sapiens | PXD004875 | <a href="https://www.ebi.ac.uk/pride/archive/projects/PXD004875">https://www.ebi.ac.uk/pride/archive/projects/PXD004875</a> | 27779380 |
| Homo | sapiens | PXD004788 | <a href="https://www.ebi.ac.uk/pride/archive/projects/PXD004788">https://www.ebi.ac.uk/pride/archive/projects/PXD004788</a> | 28071820 |
| Homo | sapiens | BioPlex_2 | <a href="https://bioplex.hms.harvard.edu/download.php">https://bioplex.hms.harvard.edu/download.php</a>                     | 28514442 |
| Homo | sapiens | PXD004181 | <a href="https://www.ebi.ac.uk/pride/archive/projects/PXD004181">https://www.ebi.ac.uk/pride/archive/projects/PXD004181</a> | 28064214 |
| Homo | sapiens | PXD002612 | <a href="https://www.ebi.ac.uk/pride/archive/projects/PXD002612">https://www.ebi.ac.uk/pride/archive/projects/PXD002612</a> | 27799870 |
| Homo | sapiens | PXD004816 | <a href="https://www.ebi.ac.uk/pride/archive/projects/PXD004816">https://www.ebi.ac.uk/pride/archive/projects/PXD004816</a> | 28123004 |
| Homo | sapiens | PXD003963 | <a href="https://www.ebi.ac.uk/pride/archive/projects/PXD003963">https://www.ebi.ac.uk/pride/archive/projects/PXD003963</a> | 28208246 |
| Homo | sapiens | PXD013338 | <a href="https://www.ebi.ac.uk/pride/archive/projects/PXD013338">https://www.ebi.ac.uk/pride/archive/projects/PXD013338</a> | 31213602 |
| Homo | sapiens | PXD003967 | <a href="https://www.ebi.ac.uk/pride/archive/projects/PXD003967">https://www.ebi.ac.uk/pride/archive/projects/PXD003967</a> | 28208246 |
| Homo | sapiens | PXD003811 | <a href="https://www.ebi.ac.uk/pride/archive/projects/PXD003811">https://www.ebi.ac.uk/pride/archive/projects/PXD003811</a> | 28062795 |
| Homo | sapiens | PXD003531 | <a href="https://www.ebi.ac.uk/pride/archive/projects/PXD003531">https://www.ebi.ac.uk/pride/archive/projects/PXD003531</a> | 28355574 |
| Homo | sapiens | PXD005210 | <a href="https://www.ebi.ac.uk/pride/archive/projects/PXD005210">https://www.ebi.ac.uk/pride/archive/projects/PXD005210</a> | 27794609 |
| Homo | sapiens | PXD001994 | <a href="https://www.ebi.ac.uk/pride/archive/projects/PXD001994">https://www.ebi.ac.uk/pride/archive/projects/PXD001994</a> | 26832662 |
| Homo | sapiens | PXD005123 | <a href="https://www.ebi.ac.uk/pride/archive/projects/PXD005123">https://www.ebi.ac.uk/pride/archive/projects/PXD005123</a> | 27892468 |
| Homo | sapiens | PXD003971 | <a href="https://www.ebi.ac.uk/pride/archive/projects/PXD003971">https://www.ebi.ac.uk/pride/archive/projects/PXD003971</a> | 28208246 |
| Homo | sapiens | PXD005276 | <a href="https://www.ebi.ac.uk/pride/archive/projects/PXD005276">https://www.ebi.ac.uk/pride/archive/projects/PXD005276</a> | 28237943 |
| Homo | sapiens | PXD004859 | <a href="https://www.ebi.ac.uk/pride/archive/projects/PXD004859">https://www.ebi.ac.uk/pride/archive/projects/PXD004859</a> | 27976366 |
| Homo | sapiens | PXD004796 | <a href="https://www.ebi.ac.uk/pride/archive/projects/PXD004796">https://www.ebi.ac.uk/pride/archive/projects/PXD004796</a> | 28071820 |
| Homo | sapiens | PXD016433 | <a href="https://www.ebi.ac.uk/pride/archive/projects/PXD016433">https://www.ebi.ac.uk/pride/archive/projects/PXD016433</a> | 33453410 |

|      |          |           |                                                                                                                             |          |
|------|----------|-----------|-----------------------------------------------------------------------------------------------------------------------------|----------|
|      |          |           | <a href="#">016433</a>                                                                                                      |          |
| Homo | sapiens  | PXD003966 | <a href="https://www.ebi.ac.uk/pride/archive/projects/PXD003966">https://www.ebi.ac.uk/pride/archive/projects/PXD003966</a> | 28208246 |
| Homo | sapiens  | PXD005739 | <a href="https://www.ebi.ac.uk/pride/archive/projects/PXD005739">https://www.ebi.ac.uk/pride/archive/projects/PXD005739</a> | 28648085 |
| Homo | sapiens  | PXD010603 | <a href="https://www.ebi.ac.uk/pride/archive/projects/PXD010603">https://www.ebi.ac.uk/pride/archive/projects/PXD010603</a> | 30735395 |
| Homo | sapiens  | PXD004626 | <a href="https://www.ebi.ac.uk/pride/archive/projects/PXD004626">https://www.ebi.ac.uk/pride/archive/projects/PXD004626</a> | 27879288 |
| Homo | sapiens  | PXD017417 | <a href="https://www.ebi.ac.uk/pride/archive/projects/PXD017417">https://www.ebi.ac.uk/pride/archive/projects/PXD017417</a> | 32966781 |
| Homo | sapiens  | PXD010138 | <a href="https://www.ebi.ac.uk/pride/archive/projects/PXD010138">https://www.ebi.ac.uk/pride/archive/projects/PXD010138</a> | 31207390 |
| Homo | sapiens  | PXD000419 | <a href="https://www.ebi.ac.uk/pride/archive/projects/PXD000419">https://www.ebi.ac.uk/pride/archive/projects/PXD000419</a> | 24136357 |
| Homo | sapiens  | PXD015850 | <a href="https://www.ebi.ac.uk/pride/archive/projects/PXD015850">https://www.ebi.ac.uk/pride/archive/projects/PXD015850</a> | 31614365 |
| Mus  | musculus | PXD000288 | <a href="https://www.ebi.ac.uk/pride/archive/projects/PXD000288">https://www.ebi.ac.uk/pride/archive/projects/PXD000288</a> | 25616865 |
| Mus  | musculus | PXD001597 | <a href="https://www.ebi.ac.uk/pride/archive/projects/PXD001597">https://www.ebi.ac.uk/pride/archive/projects/PXD001597</a> | 26227174 |
| Mus  | musculus | PXD003155 | <a href="https://www.ebi.ac.uk/pride/archive/projects/PXD003155">https://www.ebi.ac.uk/pride/archive/projects/PXD003155</a> | 26850065 |
| Mus  | musculus | PXD002156 | <a href="https://www.ebi.ac.uk/pride/archive/projects/PXD002156">https://www.ebi.ac.uk/pride/archive/projects/PXD002156</a> | 26080680 |
| Mus  | musculus | PXD001250 | <a href="https://www.ebi.ac.uk/pride/archive/projects/PXD001250">https://www.ebi.ac.uk/pride/archive/projects/PXD001250</a> | 26523646 |
| Mus  | musculus | PXD004072 | <a href="https://www.ebi.ac.uk/pride/archive/projects/PXD004072">https://www.ebi.ac.uk/pride/archive/projects/PXD004072</a> | 27188442 |
| Mus  | musculus | PXD002152 | <a href="https://www.ebi.ac.uk/pride/archive/projects/PXD002152">https://www.ebi.ac.uk/pride/archive/projects/PXD002152</a> | 27302655 |
| Mus  | musculus | PXD001792 | <a href="https://www.ebi.ac.uk/pride/archive/projects/PXD001792">https://www.ebi.ac.uk/pride/archive/projects/PXD001792</a> | 26280412 |
| Mus  | musculus | PXD005312 | <a href="https://www.ebi.ac.uk/pride/archive/projects/PXD005312">https://www.ebi.ac.uk/pride/archive/projects/PXD005312</a> | 28066266 |
| Mus  | musculus | PXD003860 | <a href="https://www.ebi.ac.uk/pride/archive/projects/PXD003860">https://www.ebi.ac.uk/pride/archive/projects/PXD003860</a> | 27432266 |
| Mus  | musculus | PXD004612 | <a href="https://www.ebi.ac.uk/pride/archive/projects/PXD004612">https://www.ebi.ac.uk/pride/archive/projects/PXD004612</a> | 28071813 |
| Mus  | musculus | PXD017284 | <a href="https://www.ebi.ac.uk/pride/archive/projects/PXD017284">https://www.ebi.ac.uk/pride/archive/projects/PXD017284</a> | 33257503 |

|        |            |           |                                                                                                                             |          |
|--------|------------|-----------|-----------------------------------------------------------------------------------------------------------------------------|----------|
|        |            |           | <a href="#">017284</a>                                                                                                      |          |
| Mus    | musculus   | PXD001293 | <a href="https://www.ebi.ac.uk/pride/archive/projects/PXD001293">https://www.ebi.ac.uk/pride/archive/projects/PXD001293</a> | 25504905 |
| Mus    | musculus   | PXD000666 | <a href="https://www.ebi.ac.uk/pride/archive/projects/PXD000666">https://www.ebi.ac.uk/pride/archive/projects/PXD000666</a> | 25193168 |
| Mus    | musculus   | PXD005635 | <a href="https://www.ebi.ac.uk/pride/archive/projects/PXD005635">https://www.ebi.ac.uk/pride/archive/projects/PXD005635</a> | 28345880 |
| Mus    | musculus   | PXD011890 | <a href="https://www.ebi.ac.uk/pride/archive/projects/PXD011890">https://www.ebi.ac.uk/pride/archive/projects/PXD011890</a> | 30901149 |
| Mus    | musculus   | PXD003442 | <a href="https://www.ebi.ac.uk/pride/archive/projects/PXD003442">https://www.ebi.ac.uk/pride/archive/projects/PXD003442</a> | 26900923 |
| Mus    | musculus   | PXD003555 | <a href="https://www.ebi.ac.uk/pride/archive/projects/PXD003555">https://www.ebi.ac.uk/pride/archive/projects/PXD003555</a> | 27490109 |
| Mus    | musculus   | PXD000747 | <a href="https://www.ebi.ac.uk/pride/archive/projects/PXD000747">https://www.ebi.ac.uk/pride/archive/projects/PXD000747</a> | 25205226 |
| Mus    | musculus   | PXD004087 | <a href="https://www.ebi.ac.uk/pride/archive/projects/PXD004087">https://www.ebi.ac.uk/pride/archive/projects/PXD004087</a> | 27629805 |
| Mus    | musculus   | PXD011334 | <a href="https://www.ebi.ac.uk/pride/archive/projects/PXD011334">https://www.ebi.ac.uk/pride/archive/projects/PXD011334</a> | 33216553 |
| Mus    | musculus   | PXD000501 | <a href="https://www.ebi.ac.uk/pride/archive/projects/PXD000501">https://www.ebi.ac.uk/pride/archive/projects/PXD000501</a> | 24753479 |
| Mus    | musculus   | PXD001514 | <a href="https://www.ebi.ac.uk/pride/archive/projects/PXD001514">https://www.ebi.ac.uk/pride/archive/projects/PXD001514</a> | 26139848 |
| Mus    | musculus   | PXD001404 | <a href="https://www.ebi.ac.uk/pride/archive/projects/PXD001404">https://www.ebi.ac.uk/pride/archive/projects/PXD001404</a> | 25338131 |
| Ovis   | aries      | PXD014050 | <a href="https://www.ebi.ac.uk/pride/archive/projects/PXD014050">https://www.ebi.ac.uk/pride/archive/projects/PXD014050</a> | 31882954 |
| Ovis   | aries      | PXD013822 | <a href="https://www.ebi.ac.uk/pride/archive/projects/PXD013822">https://www.ebi.ac.uk/pride/archive/projects/PXD013822</a> | 31136077 |
| Ovis   | aries      | PXD004989 | <a href="https://www.ebi.ac.uk/pride/archive/projects/PXD004989">https://www.ebi.ac.uk/pride/archive/projects/PXD004989</a> | 28615994 |
| Ovis   | aries      | PXD004556 | <a href="https://www.ebi.ac.uk/pride/archive/projects/PXD004556">https://www.ebi.ac.uk/pride/archive/projects/PXD004556</a> | 27784645 |
| Rattus | norvegicus | PXD004247 | <a href="https://www.ebi.ac.uk/pride/archive/projects/PXD004247">https://www.ebi.ac.uk/pride/archive/projects/PXD004247</a> | 27250205 |
| Rattus | norvegicus | PXD001984 | <a href="https://www.ebi.ac.uk/pride/archive/projects/PXD001984">https://www.ebi.ac.uk/pride/archive/projects/PXD001984</a> | 26330543 |
| Rattus | norvegicus | PXD001986 | <a href="https://www.ebi.ac.uk/pride/archive/projects/PXD001986">https://www.ebi.ac.uk/pride/archive/projects/PXD001986</a> | 26330543 |
| Rattus | norvegicus | PXD004889 | <a href="https://www.ebi.ac.uk/pride/archive/projects/PXD004889">https://www.ebi.ac.uk/pride/archive/projects/PXD004889</a> | 27764671 |



|         |            |           |                                                                                                                             |          |
|---------|------------|-----------|-----------------------------------------------------------------------------------------------------------------------------|----------|
|         |            |           | <a href="#">004889</a>                                                                                                      |          |
| Rattus  | norvegicus | PXD016447 | <a href="https://www.ebi.ac.uk/pride/archive/projects/PXD016447">https://www.ebi.ac.uk/pride/archive/projects/PXD016447</a> | 33453410 |
| Rattus  | norvegicus | PXD003520 | <a href="https://www.ebi.ac.uk/pride/archive/projects/PXD003520">https://www.ebi.ac.uk/pride/archive/projects/PXD003520</a> | 27358910 |
| Rattus  | norvegicus | PXD003375 | <a href="https://www.ebi.ac.uk/pride/archive/projects/PXD003375">https://www.ebi.ac.uk/pride/archive/projects/PXD003375</a> | 27250205 |
| Xenopus | tropicalis | PXD009577 | <a href="https://www.ebi.ac.uk/pride/archive/projects/PXD009577">https://www.ebi.ac.uk/pride/archive/projects/PXD009577</a> | 31490923 |

List of the 136 **ribosome profiling** datasets incorporated in OpenProt v2.0 along the associated species, data source and citation (PMID accession).

| Species | Study ID  | Data source                                                                                                                             | PMID     |
|---------|-----------|-----------------------------------------------------------------------------------------------------------------------------------------|----------|
| CE      | GSE52910  | <a href="https://www.ncbi.nlm.nih.gov/geo/query/acc.cgi?acc=GSE52910">https://www.ncbi.nlm.nih.gov/geo/query/acc.cgi?acc=GSE52910</a>   | 24440504 |
| CE      | GSE62859  | <a href="https://www.ncbi.nlm.nih.gov/geo/query/acc.cgi?acc=GSE62859">https://www.ncbi.nlm.nih.gov/geo/query/acc.cgi?acc=GSE62859</a>   | 25378320 |
| CE      | SRP014427 | <a href="https://www.ncbi.nlm.nih.gov/sra/?term=SRP014427">https://www.ncbi.nlm.nih.gov/sra/?term=SRP014427</a>                         | 22855835 |
| DM      | GSE49197  | <a href="https://www.ncbi.nlm.nih.gov/geo/query/acc.cgi?acc=GSE49197">https://www.ncbi.nlm.nih.gov/geo/query/acc.cgi?acc=GSE49197</a>   | 24302569 |
| DM      | GSE52799  | <a href="https://www.ncbi.nlm.nih.gov/geo/query/acc.cgi?acc=GSE52799">https://www.ncbi.nlm.nih.gov/geo/query/acc.cgi?acc=GSE52799</a>   | 24882012 |
| DM      | GSE60384  | <a href="https://www.ncbi.nlm.nih.gov/geo/query/acc.cgi?acc=GSE60384">https://www.ncbi.nlm.nih.gov/geo/query/acc.cgi?acc=GSE60384</a>   | 25144939 |
| DM      | GSE106697 | <a href="https://www.ncbi.nlm.nih.gov/geo/query/acc.cgi?acc=GSE106697">https://www.ncbi.nlm.nih.gov/geo/query/acc.cgi?acc=GSE106697</a> | 29548011 |
| DR      | GSE34743  | <a href="https://www.ncbi.nlm.nih.gov/geo/query/acc.cgi?acc=GSE34743">https://www.ncbi.nlm.nih.gov/geo/query/acc.cgi?acc=GSE34743</a>   | 22422859 |
| DR      | GSE46512  | <a href="https://www.ncbi.nlm.nih.gov/geo/query/acc.cgi?acc=GSE46512">https://www.ncbi.nlm.nih.gov/geo/query/acc.cgi?acc=GSE46512</a>   | 23698349 |
| DR      | GSE47558  | <a href="https://www.ncbi.nlm.nih.gov/geo/query/acc.cgi?acc=GSE47558">https://www.ncbi.nlm.nih.gov/geo/query/acc.cgi?acc=GSE47558</a>   | 24056933 |
| DR      | GSE52809  | <a href="https://www.ncbi.nlm.nih.gov/geo/query/acc.cgi?acc=GSE52809">https://www.ncbi.nlm.nih.gov/geo/query/acc.cgi?acc=GSE52809</a>   | 24476825 |
| DR      | GSE53693  | <a href="https://www.ncbi.nlm.nih.gov/geo/query/acc.cgi?acc=GSE53693">https://www.ncbi.nlm.nih.gov/geo/query/acc.cgi?acc=GSE53693</a>   | 24705786 |
| HS      | GSE102113 | <a href="https://www.ncbi.nlm.nih.gov/geo/query/acc.cgi?acc=GSE102113">https://www.ncbi.nlm.nih.gov/geo/query/acc.cgi?acc=GSE102113</a> | 30449621 |
| HS      | GSE103719 | <a href="https://www.ncbi.nlm.nih.gov/geo/query/acc.cgi?acc=GSE103719">https://www.ncbi.nlm.nih.gov/geo/query/acc.cgi?acc=GSE103719</a> | 30257221 |
| HS      | GSE105082 | <a href="https://www.ncbi.nlm.nih.gov/geo/query/acc.cgi?acc=GSE105082">https://www.ncbi.nlm.nih.gov/geo/query/acc.cgi?acc=GSE105082</a> | 30591072 |
| HS      | GSE105172 | <a href="https://www.ncbi.nlm.nih.gov/geo/query/acc.cgi?acc=GSE105172">https://www.ncbi.nlm.nih.gov/geo/query/acc.cgi?acc=GSE105172</a> | 31160600 |
| HS      | GSE110323 | <a href="https://www.ncbi.nlm.nih.gov/geo/query/acc.cgi?acc=GSE110323">https://www.ncbi.nlm.nih.gov/geo/query/acc.cgi?acc=GSE110323</a> | 30867593 |
| HS      | GSE111866 | <a href="https://www.ncbi.nlm.nih.gov/geo/query/acc.cgi?acc=GSE111866">https://www.ncbi.nlm.nih.gov/geo/query/acc.cgi?acc=GSE111866</a> | 30102689 |
| HS      | GSE112276 | <a href="https://www.ncbi.nlm.nih.gov/geo/query/acc.cgi?acc=GSE112276">https://www.ncbi.nlm.nih.gov/geo/query/acc.cgi?acc=GSE112276</a> | 31031084 |
| HS      | GSE112353 | <a href="https://www.ncbi.nlm.nih.gov/geo/query/acc.cgi?acc=GSE112353">https://www.ncbi.nlm.nih.gov/geo/query/acc.cgi?acc=GSE112353</a> | 30355487 |
| HS      | GSE115146 | <a href="https://www.ncbi.nlm.nih.gov/geo/query/acc.cgi?acc=GSE115146">https://www.ncbi.nlm.nih.gov/geo/query/acc.cgi?acc=GSE115146</a> | 30297778 |
| HS      | GSE118050 | <a href="https://www.ncbi.nlm.nih.gov/geo/query/acc.cgi?acc=GSE118050">https://www.ncbi.nlm.nih.gov/geo/query/acc.cgi?acc=GSE118050</a> | 30260431 |
| HS      | GSE122461 | <a href="https://www.ncbi.nlm.nih.gov/geo/query/acc.cgi?acc=GSE122461">https://www.ncbi.nlm.nih.gov/geo/query/acc.cgi?acc=GSE122461</a> | 30640896 |
| HS      | GSE123564 | <a href="https://www.ncbi.nlm.nih.gov/geo/query/acc.cgi?acc=GSE123564">https://www.ncbi.nlm.nih.gov/geo/query/acc.cgi?acc=GSE123564</a> | 30707697 |
| HS      | GSE125218 | <a href="https://www.ncbi.nlm.nih.gov/geo/query/acc.cgi?acc=GSE125218">https://www.ncbi.nlm.nih.gov/geo/query/acc.cgi?acc=GSE125218</a> | 31819274 |
| HS      | GSE129869 | <a href="https://www.ncbi.nlm.nih.gov/geo/query/acc.cgi?acc=GSE129869">https://www.ncbi.nlm.nih.gov/geo/query/acc.cgi?acc=GSE129869</a> | 31167946 |
| HS      | GSE130781 | <a href="https://www.ncbi.nlm.nih.gov/geo/query/acc.cgi?acc=GSE130781">https://www.ncbi.nlm.nih.gov/geo/query/acc.cgi?acc=GSE130781</a> | 31944153 |
| HS      | GSE131112 | <a href="https://www.ncbi.nlm.nih.gov/geo/query/acc.cgi?acc=GSE131112">https://www.ncbi.nlm.nih.gov/geo/query/acc.cgi?acc=GSE131112</a> | 31284728 |
| HS      | GSE131809 | <a href="https://www.ncbi.nlm.nih.gov/geo/query/acc.cgi?acc=GSE131809">https://www.ncbi.nlm.nih.gov/geo/query/acc.cgi?acc=GSE131809</a> | 31959994 |
| HS      | GSE132725 | <a href="https://www.ncbi.nlm.nih.gov/geo/query/acc.cgi?acc=GSE132725">https://www.ncbi.nlm.nih.gov/geo/query/acc.cgi?acc=GSE132725</a> | 31340047 |
| HS      | GSE133111 | <a href="https://www.ncbi.nlm.nih.gov/geo/query/acc.cgi?acc=GSE133111">https://www.ncbi.nlm.nih.gov/geo/query/acc.cgi?acc=GSE133111</a> |          |
| HS      | GSE134752 | <a href="https://www.ncbi.nlm.nih.gov/geo/query/acc.cgi?acc=GSE134752">https://www.ncbi.nlm.nih.gov/geo/query/acc.cgi?acc=GSE134752</a> | 32348767 |
| HS      | GSE37744  | <a href="https://www.ncbi.nlm.nih.gov/geo/query/acc.cgi?acc=GSE37744">https://www.ncbi.nlm.nih.gov/geo/query/acc.cgi?acc=GSE37744</a>   | 22836135 |
| HS      | GSE39561  | <a href="https://www.ncbi.nlm.nih.gov/geo/query/acc.cgi?acc=GSE39561">https://www.ncbi.nlm.nih.gov/geo/query/acc.cgi?acc=GSE39561</a>   | 22879431 |
| HS      | GSE41605  | <a href="https://www.ncbi.nlm.nih.gov/geo/query/acc.cgi?acc=GSE41605">https://www.ncbi.nlm.nih.gov/geo/query/acc.cgi?acc=GSE41605</a>   | 23180859 |
| HS      | GSE45833  | <a href="https://www.ncbi.nlm.nih.gov/geo/query/acc.cgi?acc=GSE45833">https://www.ncbi.nlm.nih.gov/geo/query/acc.cgi?acc=GSE45833</a>   | 23594524 |
| HS      | GSE48785  | <a href="https://www.ncbi.nlm.nih.gov/geo/query/acc.cgi?acc=GSE48785">https://www.ncbi.nlm.nih.gov/geo/query/acc.cgi?acc=GSE48785</a>   | 24171104 |
| HS      | GSE48933  | <a href="https://www.ncbi.nlm.nih.gov/geo/query/acc.cgi?acc=GSE48933">https://www.ncbi.nlm.nih.gov/geo/query/acc.cgi?acc=GSE48933</a>   | 24301020 |
| HS      | GSE49339  | <a href="https://www.ncbi.nlm.nih.gov/geo/query/acc.cgi?acc=GSE49339">https://www.ncbi.nlm.nih.gov/geo/query/acc.cgi?acc=GSE49339</a>   | 23453015 |
| HS      | GSE51424  | <a href="https://www.ncbi.nlm.nih.gov/geo/query/acc.cgi?acc=GSE51424">https://www.ncbi.nlm.nih.gov/geo/query/acc.cgi?acc=GSE51424</a>   | 25122893 |
| HS      | GSE51584  | <a href="https://www.ncbi.nlm.nih.gov/geo/query/acc.cgi?acc=GSE51584">https://www.ncbi.nlm.nih.gov/geo/query/acc.cgi?acc=GSE51584</a>   | 25070500 |
| HS      | GSE52976  | <a href="https://www.ncbi.nlm.nih.gov/geo/query/acc.cgi?acc=GSE52976">https://www.ncbi.nlm.nih.gov/geo/query/acc.cgi?acc=GSE52976</a>   | 25366541 |
| HS      | GSE55195  | <a href="https://www.ncbi.nlm.nih.gov/geo/query/acc.cgi?acc=GSE55195">https://www.ncbi.nlm.nih.gov/geo/query/acc.cgi?acc=GSE55195</a>   | 25621764 |
| HS      | GSE56887  | <a href="https://www.ncbi.nlm.nih.gov/geo/query/acc.cgi?acc=GSE56887">https://www.ncbi.nlm.nih.gov/geo/query/acc.cgi?acc=GSE56887</a>   | 25079319 |
| HS      | GSE56924  | <a href="https://www.ncbi.nlm.nih.gov/geo/query/acc.cgi?acc=GSE56924">https://www.ncbi.nlm.nih.gov/geo/query/acc.cgi?acc=GSE56924</a>   | 26338483 |
| HS      | GSE58207  | <a href="https://www.ncbi.nlm.nih.gov/geo/query/acc.cgi?acc=GSE58207">https://www.ncbi.nlm.nih.gov/geo/query/acc.cgi?acc=GSE58207</a>   | 25510491 |
| HS      | GSE59821  | <a href="https://www.ncbi.nlm.nih.gov/geo/query/acc.cgi?acc=GSE59821">https://www.ncbi.nlm.nih.gov/geo/query/acc.cgi?acc=GSE59821</a>   | 26878238 |
| HS      | GSE60040  | <a href="https://www.ncbi.nlm.nih.gov/geo/query/acc.cgi?acc=GSE60040">https://www.ncbi.nlm.nih.gov/geo/query/acc.cgi?acc=GSE60040</a>   | 25989971 |
| HS      | GSE60095  | <a href="https://www.ncbi.nlm.nih.gov/geo/query/acc.cgi?acc=GSE60095">https://www.ncbi.nlm.nih.gov/geo/query/acc.cgi?acc=GSE60095</a>   | 25159147 |

|    |           |                                                                                                                                         |          |
|----|-----------|-----------------------------------------------------------------------------------------------------------------------------------------|----------|
| HS | GSE61375  | <a href="https://www.ncbi.nlm.nih.gov/geo/query/acc.cgi?acc=GSE61375">https://www.ncbi.nlm.nih.gov/geo/query/acc.cgi?acc=GSE61375</a>   | 25273840 |
| HS | GSE62247  | <a href="https://www.ncbi.nlm.nih.gov/geo/query/acc.cgi?acc=GSE62247">https://www.ncbi.nlm.nih.gov/geo/query/acc.cgi?acc=GSE62247</a>   | 26399832 |
| HS | GSE63570  | <a href="https://www.ncbi.nlm.nih.gov/geo/query/acc.cgi?acc=GSE63570">https://www.ncbi.nlm.nih.gov/geo/query/acc.cgi?acc=GSE63570</a>   | 25896322 |
| HS | GSE64962  | <a href="https://www.ncbi.nlm.nih.gov/geo/query/acc.cgi?acc=GSE64962">https://www.ncbi.nlm.nih.gov/geo/query/acc.cgi?acc=GSE64962</a>   | 26729373 |
| HS | GSE65778  | <a href="https://www.ncbi.nlm.nih.gov/geo/query/acc.cgi?acc=GSE65778">https://www.ncbi.nlm.nih.gov/geo/query/acc.cgi?acc=GSE65778</a>   | 25719440 |
| HS | GSE65885  | <a href="https://www.ncbi.nlm.nih.gov/geo/query/acc.cgi?acc=GSE65885">https://www.ncbi.nlm.nih.gov/geo/query/acc.cgi?acc=GSE65885</a>   | 26687005 |
| HS | GSE65912  | <a href="https://www.ncbi.nlm.nih.gov/geo/query/acc.cgi?acc=GSE65912">https://www.ncbi.nlm.nih.gov/geo/query/acc.cgi?acc=GSE65912</a>   | 26297486 |
| HS | GSE66927  | <a href="https://www.ncbi.nlm.nih.gov/geo/query/acc.cgi?acc=GSE66927">https://www.ncbi.nlm.nih.gov/geo/query/acc.cgi?acc=GSE66927</a>   | 26538417 |
| HS | GSE67902  | <a href="https://www.ncbi.nlm.nih.gov/geo/query/acc.cgi?acc=GSE67902">https://www.ncbi.nlm.nih.gov/geo/query/acc.cgi?acc=GSE67902</a>   | 26305499 |
| HS | GSE68008  | <a href="https://www.ncbi.nlm.nih.gov/geo/query/acc.cgi?acc=GSE68008">https://www.ncbi.nlm.nih.gov/geo/query/acc.cgi?acc=GSE68008</a>   | 26164698 |
| HS | GSE69906  | <a href="https://www.ncbi.nlm.nih.gov/geo/query/acc.cgi?acc=GSE69906">https://www.ncbi.nlm.nih.gov/geo/query/acc.cgi?acc=GSE69906</a>   | 26599541 |
| HS | GSE70211  | <a href="https://www.ncbi.nlm.nih.gov/geo/query/acc.cgi?acc=GSE70211">https://www.ncbi.nlm.nih.gov/geo/query/acc.cgi?acc=GSE70211</a>   | 27309803 |
| HS | GSE70802  | <a href="https://www.ncbi.nlm.nih.gov/geo/query/acc.cgi?acc=GSE70802">https://www.ncbi.nlm.nih.gov/geo/query/acc.cgi?acc=GSE70802</a>   | 27058758 |
| HS | GSE73136  | <a href="https://www.ncbi.nlm.nih.gov/geo/query/acc.cgi?acc=GSE73136">https://www.ncbi.nlm.nih.gov/geo/query/acc.cgi?acc=GSE73136</a>   | 26657557 |
| HS | GSE73565  | <a href="https://www.ncbi.nlm.nih.gov/geo/query/acc.cgi?acc=GSE73565">https://www.ncbi.nlm.nih.gov/geo/query/acc.cgi?acc=GSE73565</a>   | 26898226 |
| HS | GSE75290  | <a href="https://www.ncbi.nlm.nih.gov/geo/query/acc.cgi?acc=GSE75290">https://www.ncbi.nlm.nih.gov/geo/query/acc.cgi?acc=GSE75290</a>   | 27232982 |
| HS | GSE79664  | <a href="https://www.ncbi.nlm.nih.gov/geo/query/acc.cgi?acc=GSE79664">https://www.ncbi.nlm.nih.gov/geo/query/acc.cgi?acc=GSE79664</a>   | 27153541 |
| HS | GSE85864  | <a href="https://www.ncbi.nlm.nih.gov/geo/query/acc.cgi?acc=GSE85864">https://www.ncbi.nlm.nih.gov/geo/query/acc.cgi?acc=GSE85864</a>   | 27681415 |
| HS | GSE86214  | <a href="https://www.ncbi.nlm.nih.gov/geo/query/acc.cgi?acc=GSE86214">https://www.ncbi.nlm.nih.gov/geo/query/acc.cgi?acc=GSE86214</a>   | 28106072 |
| HS | GSE93133  | <a href="https://www.ncbi.nlm.nih.gov/geo/query/acc.cgi?acc=GSE93133">https://www.ncbi.nlm.nih.gov/geo/query/acc.cgi?acc=GSE93133</a>   | 28108655 |
| HS | GSE94460  | <a href="https://www.ncbi.nlm.nih.gov/geo/query/acc.cgi?acc=GSE94460">https://www.ncbi.nlm.nih.gov/geo/query/acc.cgi?acc=GSE94460</a>   | 29170441 |
| HS | GSE97140  | <a href="https://www.ncbi.nlm.nih.gov/geo/query/acc.cgi?acc=GSE97140">https://www.ncbi.nlm.nih.gov/geo/query/acc.cgi?acc=GSE97140</a>   | 28520920 |
| HS | GSE97384  | <a href="https://www.ncbi.nlm.nih.gov/geo/query/acc.cgi?acc=GSE97384">https://www.ncbi.nlm.nih.gov/geo/query/acc.cgi?acc=GSE97384</a>   | 28494858 |
| HS | SRA049309 | <a href="https://www.ncbi.nlm.nih.gov/sra/?term=SRA049309">https://www.ncbi.nlm.nih.gov/sra/?term=SRA049309</a>                         | 22045228 |
| HS | SRA056377 | <a href="https://www.ncbi.nlm.nih.gov/sra/?term=SRA056377">https://www.ncbi.nlm.nih.gov/sra/?term=SRA056377</a>                         | 22927429 |
| HS | SRA061778 | <a href="https://www.ncbi.nlm.nih.gov/sra/?term=SRA061778">https://www.ncbi.nlm.nih.gov/sra/?term=SRA061778</a>                         | 23290916 |
| HS | GSE63591  | <a href="https://www.ncbi.nlm.nih.gov/sra/?term=SRA099816">https://www.ncbi.nlm.nih.gov/sra/?term=SRA099816</a>                         | 26046440 |
| HS | SRA099816 | <a href="https://www.ncbi.nlm.nih.gov/sra/?term=SRA099816">https://www.ncbi.nlm.nih.gov/sra/?term=SRA099816</a>                         | 24120665 |
| HS | GSE74279  | <a href="https://www.ncbi.nlm.nih.gov/geo/query/acc.cgi?acc=GSE74279">https://www.ncbi.nlm.nih.gov/geo/query/acc.cgi?acc=GSE74279</a>   | 26893308 |
| HS | GSE56148  | <a href="https://www.ncbi.nlm.nih.gov/geo/query/acc.cgi?acc=GSE56148">https://www.ncbi.nlm.nih.gov/geo/query/acc.cgi?acc=GSE56148</a>   | 25108525 |
| HS | GSE131111 | <a href="https://www.ncbi.nlm.nih.gov/geo/query/acc.cgi?acc=GSE131111">https://www.ncbi.nlm.nih.gov/geo/query/acc.cgi?acc=GSE131111</a> | 31284728 |
| HS | GSE124558 | <a href="https://www.ncbi.nlm.nih.gov/geo/query/acc.cgi?acc=GSE124558">https://www.ncbi.nlm.nih.gov/geo/query/acc.cgi?acc=GSE124558</a> | 31819270 |
| HS | GSE141013 | <a href="https://www.ncbi.nlm.nih.gov/geo/query/acc.cgi?acc=GSE141013">https://www.ncbi.nlm.nih.gov/geo/query/acc.cgi?acc=GSE141013</a> | 32488114 |
| HS | GSE136664 | <a href="https://www.ncbi.nlm.nih.gov/geo/query/acc.cgi?acc=GSE136664">https://www.ncbi.nlm.nih.gov/geo/query/acc.cgi?acc=GSE136664</a> | 32064749 |
| HS | GSE121391 | <a href="https://www.ncbi.nlm.nih.gov/geo/query/acc.cgi?acc=GSE121391">https://www.ncbi.nlm.nih.gov/geo/query/acc.cgi?acc=GSE121391</a> | 30819820 |
| HS | GSE66810  | <a href="https://www.ncbi.nlm.nih.gov/geo/query/acc.cgi?acc=GSE66810">https://www.ncbi.nlm.nih.gov/geo/query/acc.cgi?acc=GSE66810</a>   | 26147685 |
| MM | GSE103667 | <a href="https://www.ncbi.nlm.nih.gov/geo/query/acc.cgi?acc=GSE103667">https://www.ncbi.nlm.nih.gov/geo/query/acc.cgi?acc=GSE103667</a> | 29576526 |
| MM | GSE105147 | <a href="https://www.ncbi.nlm.nih.gov/geo/query/acc.cgi?acc=GSE105147">https://www.ncbi.nlm.nih.gov/geo/query/acc.cgi?acc=GSE105147</a> | 30643286 |
| MM | GSE106529 | <a href="https://www.ncbi.nlm.nih.gov/geo/query/acc.cgi?acc=GSE106529">https://www.ncbi.nlm.nih.gov/geo/query/acc.cgi?acc=GSE106529</a> | 31186416 |
| MM | GSE115106 | <a href="https://www.ncbi.nlm.nih.gov/geo/query/acc.cgi?acc=GSE115106">https://www.ncbi.nlm.nih.gov/geo/query/acc.cgi?acc=GSE115106</a> | 30728504 |
| MM | GSE115110 | <a href="https://www.ncbi.nlm.nih.gov/geo/query/acc.cgi?acc=GSE115110">https://www.ncbi.nlm.nih.gov/geo/query/acc.cgi?acc=GSE115110</a> | 31296853 |
| MM | GSE119365 | <a href="https://www.ncbi.nlm.nih.gov/geo/query/acc.cgi?acc=GSE119365">https://www.ncbi.nlm.nih.gov/geo/query/acc.cgi?acc=GSE119365</a> | 31033440 |
| MM | GSE124280 | <a href="https://www.ncbi.nlm.nih.gov/geo/query/acc.cgi?acc=GSE124280">https://www.ncbi.nlm.nih.gov/geo/query/acc.cgi?acc=GSE124280</a> | 31924774 |
| MM | GSE129816 | <a href="https://www.ncbi.nlm.nih.gov/geo/query/acc.cgi?acc=GSE129816">https://www.ncbi.nlm.nih.gov/geo/query/acc.cgi?acc=GSE129816</a> | 31483294 |
| MM | GSE129818 | <a href="https://www.ncbi.nlm.nih.gov/geo/query/acc.cgi?acc=GSE129818">https://www.ncbi.nlm.nih.gov/geo/query/acc.cgi?acc=GSE129818</a> | 31483294 |
| MM | GSE130898 | <a href="https://www.ncbi.nlm.nih.gov/geo/query/acc.cgi?acc=GSE130898">https://www.ncbi.nlm.nih.gov/geo/query/acc.cgi?acc=GSE130898</a> | 31371437 |
| MM | GSE141599 | <a href="https://www.ncbi.nlm.nih.gov/geo/query/acc.cgi?acc=GSE141599">https://www.ncbi.nlm.nih.gov/geo/query/acc.cgi?acc=GSE141599</a> | 31999954 |
| MM | GSE142802 | <a href="https://www.ncbi.nlm.nih.gov/geo/query/acc.cgi?acc=GSE142802">https://www.ncbi.nlm.nih.gov/geo/query/acc.cgi?acc=GSE142802</a> | 32123389 |
| MM | GSE22004  | <a href="https://www.ncbi.nlm.nih.gov/geo/query/acc.cgi?acc=GSE22004">https://www.ncbi.nlm.nih.gov/geo/query/acc.cgi?acc=GSE22004</a>   | 20703300 |
| MM | GSE30839  | <a href="https://www.ncbi.nlm.nih.gov/geo/query/acc.cgi?acc=GSE30839">https://www.ncbi.nlm.nih.gov/geo/query/acc.cgi?acc=GSE30839</a>   | 22056041 |
| MM | GSE36892  | <a href="https://www.ncbi.nlm.nih.gov/geo/query/acc.cgi?acc=GSE36892">https://www.ncbi.nlm.nih.gov/geo/query/acc.cgi?acc=GSE36892</a>   | 22552098 |
| MM | GSE41785  | <a href="https://www.ncbi.nlm.nih.gov/geo/query/acc.cgi?acc=GSE41785">https://www.ncbi.nlm.nih.gov/geo/query/acc.cgi?acc=GSE41785</a>   | 23766421 |
| MM | GSE46038  | <a href="https://www.ncbi.nlm.nih.gov/geo/query/acc.cgi?acc=GSE46038">https://www.ncbi.nlm.nih.gov/geo/query/acc.cgi?acc=GSE46038</a>   | 23696641 |

|    |           |                                                                                                                                         |          |
|----|-----------|-----------------------------------------------------------------------------------------------------------------------------------------|----------|
| MM | GSE50983  | <a href="https://www.ncbi.nlm.nih.gov/geo/query/acc.cgi?acc=GSE50983">https://www.ncbi.nlm.nih.gov/geo/query/acc.cgi?acc=GSE50983</a>   | 25063675 |
| MM | GSE53743  | <a href="https://www.ncbi.nlm.nih.gov/geo/query/acc.cgi?acc=GSE53743">https://www.ncbi.nlm.nih.gov/geo/query/acc.cgi?acc=GSE53743</a>   | 25215492 |
| MM | GSE58423  | <a href="https://www.ncbi.nlm.nih.gov/geo/query/acc.cgi?acc=GSE58423">https://www.ncbi.nlm.nih.gov/geo/query/acc.cgi?acc=GSE58423</a>   | 25380226 |
| MM | GSE59793  | <a href="https://www.ncbi.nlm.nih.gov/geo/query/acc.cgi?acc=GSE59793">https://www.ncbi.nlm.nih.gov/geo/query/acc.cgi?acc=GSE59793</a>   | 25745177 |
| MM | GSE60426  | <a href="https://www.ncbi.nlm.nih.gov/geo/query/acc.cgi?acc=GSE60426">https://www.ncbi.nlm.nih.gov/geo/query/acc.cgi?acc=GSE60426</a>   | 25263593 |
| MM | GSE67305  | <a href="https://www.ncbi.nlm.nih.gov/geo/query/acc.cgi?acc=GSE67305">https://www.ncbi.nlm.nih.gov/geo/query/acc.cgi?acc=GSE67305</a>   | 26486724 |
| MM | GSE69800  | <a href="https://www.ncbi.nlm.nih.gov/geo/query/acc.cgi?acc=GSE69800">https://www.ncbi.nlm.nih.gov/geo/query/acc.cgi?acc=GSE69800</a>   | 27161320 |
| MM | GSE72066  | <a href="https://www.ncbi.nlm.nih.gov/geo/query/acc.cgi?acc=GSE72066">https://www.ncbi.nlm.nih.gov/geo/query/acc.cgi?acc=GSE72066</a>   | 27306184 |
| MM | GSE72851  | <a href="https://www.ncbi.nlm.nih.gov/geo/query/acc.cgi?acc=GSE72851">https://www.ncbi.nlm.nih.gov/geo/query/acc.cgi?acc=GSE72851</a>   | 28225755 |
| MM | GSE73369  | <a href="https://www.ncbi.nlm.nih.gov/geo/query/acc.cgi?acc=GSE73369">https://www.ncbi.nlm.nih.gov/geo/query/acc.cgi?acc=GSE73369</a>   | 26443847 |
| MM | GSE74139  | <a href="https://www.ncbi.nlm.nih.gov/geo/query/acc.cgi?acc=GSE74139">https://www.ncbi.nlm.nih.gov/geo/query/acc.cgi?acc=GSE74139</a>   | 26638175 |
| MM | GSE74683  | <a href="https://www.ncbi.nlm.nih.gov/geo/query/acc.cgi?acc=GSE74683">https://www.ncbi.nlm.nih.gov/geo/query/acc.cgi?acc=GSE74683</a>   | 26651292 |
| MM | GSE83332  | <a href="https://www.ncbi.nlm.nih.gov/geo/query/acc.cgi?acc=GSE83332">https://www.ncbi.nlm.nih.gov/geo/query/acc.cgi?acc=GSE83332</a>   | 28077873 |
| MM | GSE83823  | <a href="https://www.ncbi.nlm.nih.gov/geo/query/acc.cgi?acc=GSE83823">https://www.ncbi.nlm.nih.gov/geo/query/acc.cgi?acc=GSE83823</a>   | 27899360 |
| MM | GSE84112  | <a href="https://www.ncbi.nlm.nih.gov/geo/query/acc.cgi?acc=GSE84112">https://www.ncbi.nlm.nih.gov/geo/query/acc.cgi?acc=GSE84112</a>   | 27956496 |
| MM | GSE89108  | <a href="https://www.ncbi.nlm.nih.gov/geo/query/acc.cgi?acc=GSE89108">https://www.ncbi.nlm.nih.gov/geo/query/acc.cgi?acc=GSE89108</a>   | 28720757 |
| MM | PRJEB7207 | <a href="http://www.ebi.ac.uk/ena/data/view/PRJEB7207">http://www.ebi.ac.uk/ena/data/view/PRJEB7207</a>                                 | 25873627 |
| MM | SRA160745 | <a href="https://www.ncbi.nlm.nih.gov/sra/?term=SRA160745">https://www.ncbi.nlm.nih.gov/sra/?term=SRA160745</a>                         | 25486063 |
| MM | GSE62134  | <a href="https://www.ncbi.nlm.nih.gov/geo/query/acc.cgi?acc=GSE62134">https://www.ncbi.nlm.nih.gov/geo/query/acc.cgi?acc=GSE62134</a>   | 25706746 |
| MM | GSE72064  | <a href="https://www.ncbi.nlm.nih.gov/geo/query/acc.cgi?acc=GSE72064">https://www.ncbi.nlm.nih.gov/geo/query/acc.cgi?acc=GSE72064</a>   | 26430118 |
| MM | GSE65786  | <a href="https://www.ncbi.nlm.nih.gov/geo/query/acc.cgi?acc=GSE65786">https://www.ncbi.nlm.nih.gov/geo/query/acc.cgi?acc=GSE65786</a>   | 32015435 |
| MM | GSE116083 | <a href="https://www.ncbi.nlm.nih.gov/geo/query/acc.cgi?acc=GSE116083">https://www.ncbi.nlm.nih.gov/geo/query/acc.cgi?acc=GSE116083</a> | 31366581 |
| MM | GSE116983 | <a href="https://www.ncbi.nlm.nih.gov/geo/query/acc.cgi?acc=GSE116983">https://www.ncbi.nlm.nih.gov/geo/query/acc.cgi?acc=GSE116983</a> | 30420357 |
| RN | GSE110426 | <a href="https://www.ncbi.nlm.nih.gov/geo/query/acc.cgi?acc=GSE110426">https://www.ncbi.nlm.nih.gov/geo/query/acc.cgi?acc=GSE110426</a> | 29878763 |
| RN | GSE66715  | <a href="https://www.ncbi.nlm.nih.gov/geo/query/acc.cgi?acc=GSE66715">https://www.ncbi.nlm.nih.gov/geo/query/acc.cgi?acc=GSE66715</a>   | 27135913 |
| RN | GSE60752  | <a href="https://www.ncbi.nlm.nih.gov/geo/query/acc.cgi?acc=GSE60752">https://www.ncbi.nlm.nih.gov/geo/query/acc.cgi?acc=GSE60752</a>   | 25943107 |
| RN | ERP007231 | <a href="https://www.ncbi.nlm.nih.gov/sra/?term=ERP007231">https://www.ncbi.nlm.nih.gov/sra/?term=ERP007231</a>                         | 26007203 |
| SC | GSE34082  | <a href="https://www.ncbi.nlm.nih.gov/geo/query/acc.cgi?acc=GSE34082">https://www.ncbi.nlm.nih.gov/geo/query/acc.cgi?acc=GSE34082</a>   | 22194413 |
| SC | GSE45366  | <a href="https://www.ncbi.nlm.nih.gov/geo/query/acc.cgi?acc=GSE45366">https://www.ncbi.nlm.nih.gov/geo/query/acc.cgi?acc=GSE45366</a>   | 23935536 |
| SC | GSE61012  | <a href="https://www.ncbi.nlm.nih.gov/geo/query/acc.cgi?acc=GSE61012">https://www.ncbi.nlm.nih.gov/geo/query/acc.cgi?acc=GSE61012</a>   | 25378630 |
| SC | GSE63789  | <a href="https://www.ncbi.nlm.nih.gov/geo/query/acc.cgi?acc=GSE63789">https://www.ncbi.nlm.nih.gov/geo/query/acc.cgi?acc=GSE63789</a>   | 25538139 |
| SC | GSE67387  | <a href="https://www.ncbi.nlm.nih.gov/geo/query/acc.cgi?acc=GSE67387">https://www.ncbi.nlm.nih.gov/geo/query/acc.cgi?acc=GSE67387</a>   | 26052047 |
| SC | GSE75322  | <a href="https://www.ncbi.nlm.nih.gov/geo/query/acc.cgi?acc=GSE75322">https://www.ncbi.nlm.nih.gov/geo/query/acc.cgi?acc=GSE75322</a>   | 26887592 |
| SC | GSE82220  | <a href="https://www.ncbi.nlm.nih.gov/geo/query/acc.cgi?acc=GSE82220">https://www.ncbi.nlm.nih.gov/geo/query/acc.cgi?acc=GSE82220</a>   | 27638886 |
